# Supplementary material
Source: publisher site journal article supplement (https://www.dovepress.com/article/480782)
Supplement: Supplementary file 1 [file get_supplementary_file.php]

**Supplementary Figure 1. Study design and procedures of animal experiments.**
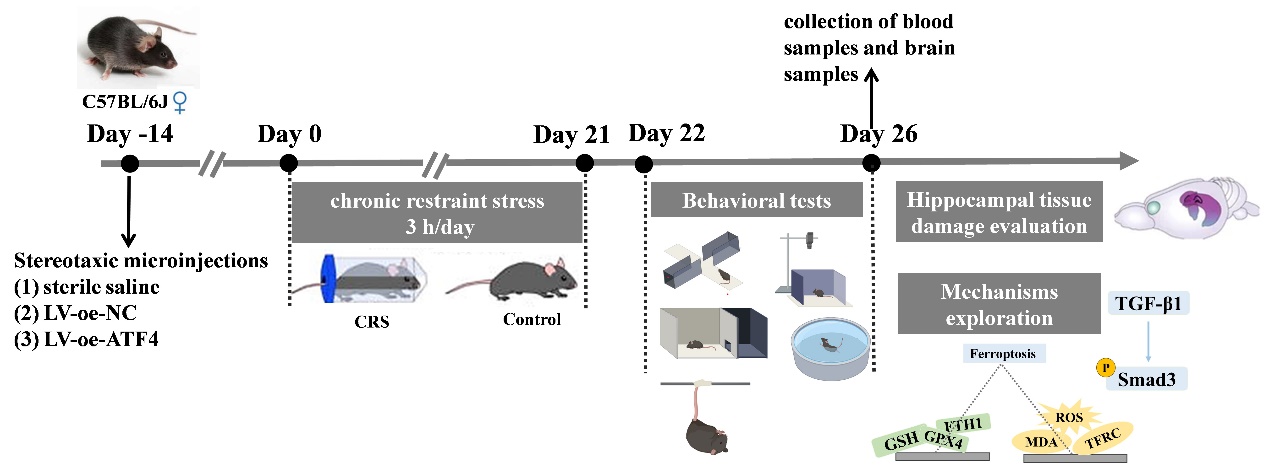


**Supplementary Figure 2. The protein-protein interaction (PPI) network analysis. (A)** The PPI network of FDEGs. **(B)** A gene cluster of FDEGs identified by the plug-in Molecular Complex Detection. **(C)** Degrees of genes were calculated by the degree algorithms of CytoHubba.

**
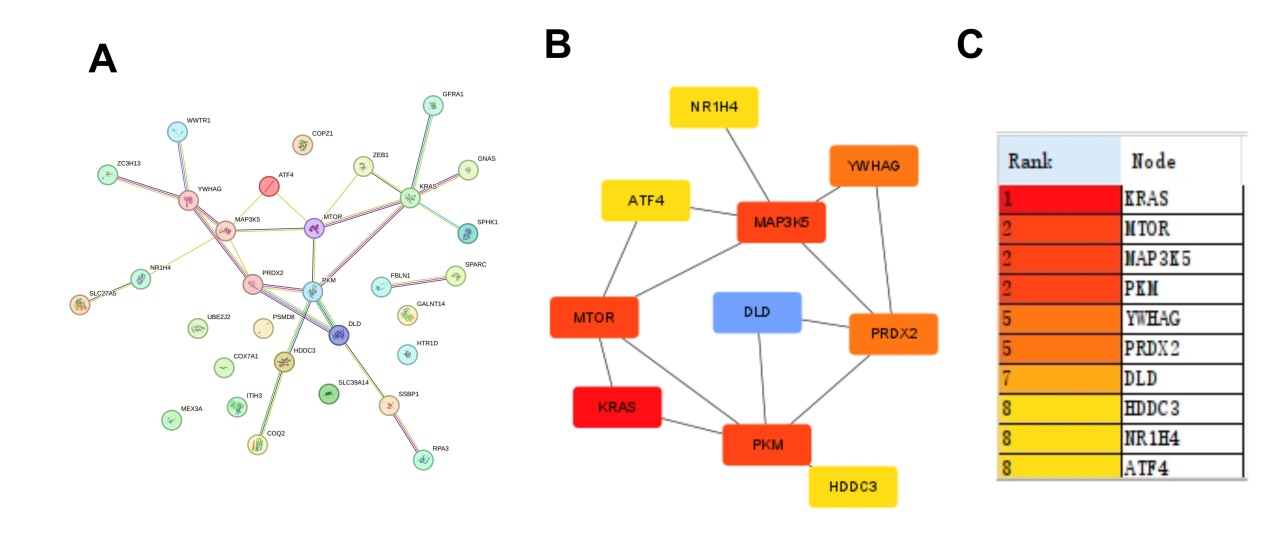
**

**Supplementary Figure 3.** **Receiver operating characteristic curves of hub genes.** The horizontal coordinate was the false positive rate, and the vertical coordinate was the true positive rate.


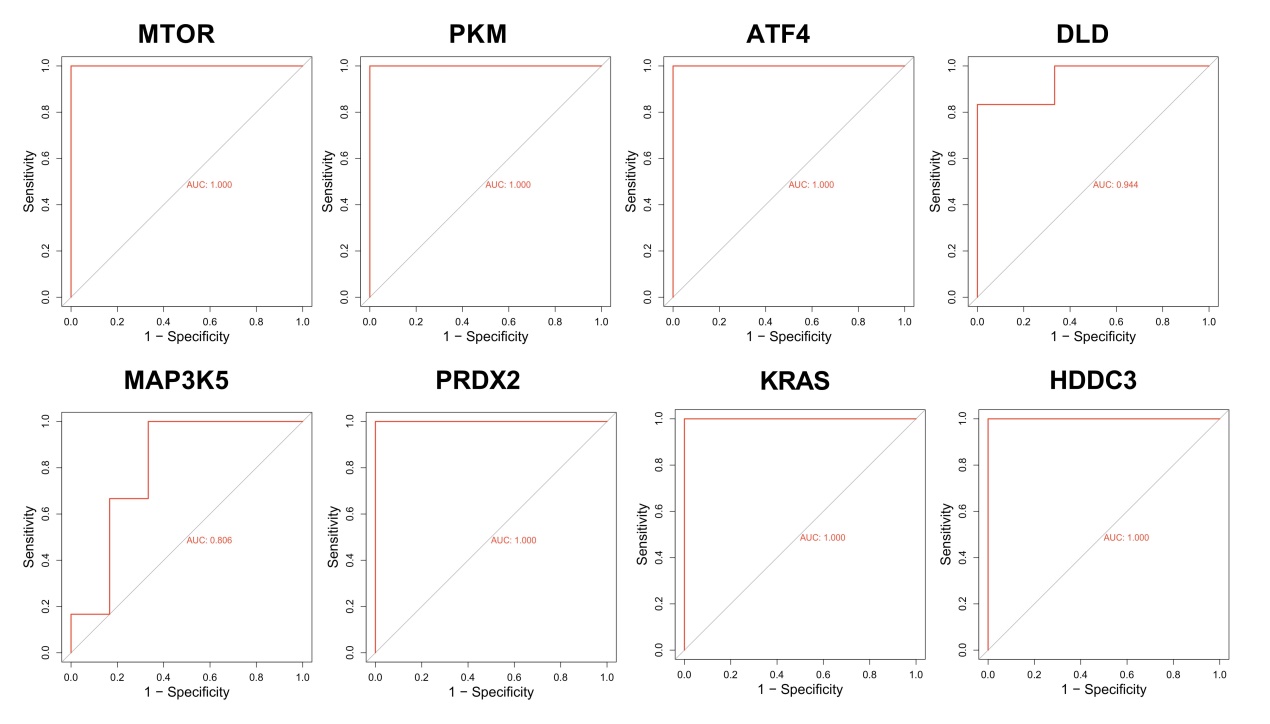


**Supplementary Figure 4.** **ATF4 validation in the GSE100085 dataset. (A)** A box line plot showed the expression difference of ATF4 between the Control group and the Anxiety group in GSE100085. **(B)** The receiver operating characteristic curve of ATF4. The horizontal coordinate was the false positive rate, and the vertical coordinate was the true positive rate.


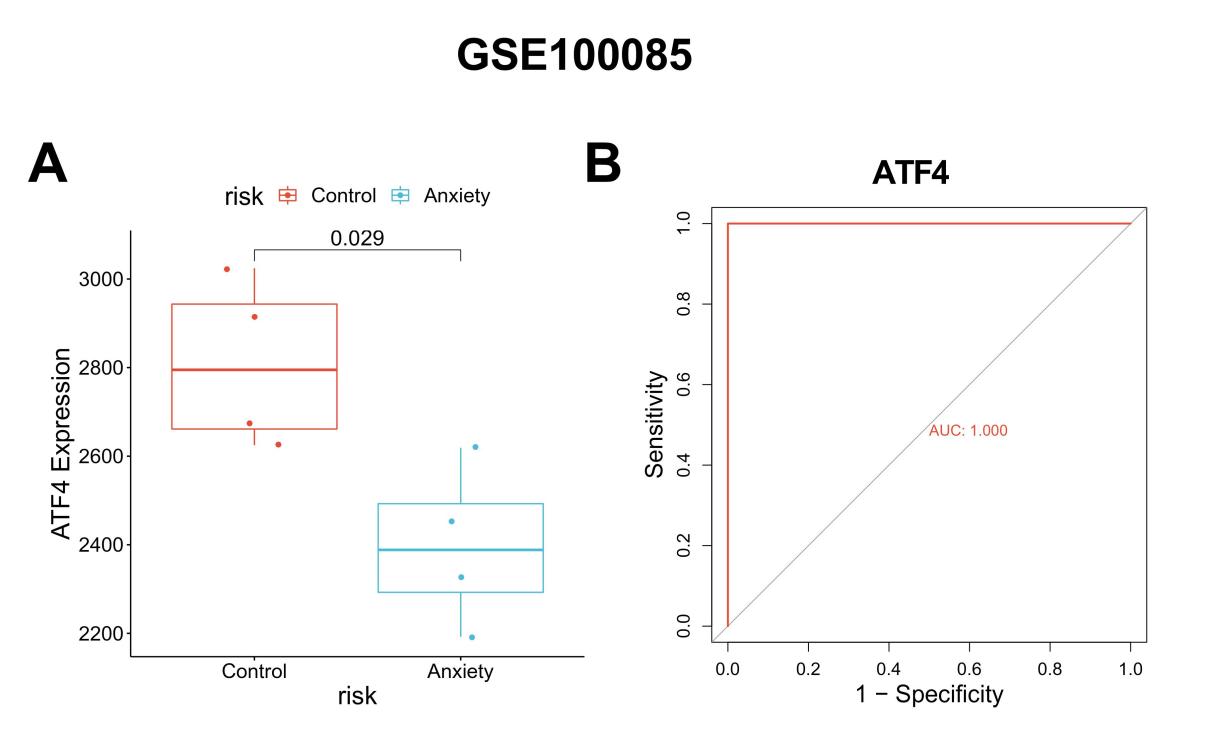


**Supplementary Table 1. The sequences of primers**

| Name | Sequence（5’-3’） |
| --- | --- |
| M-GAPDH-F | CTCATGACCACAGTCCATGC |
| M-GAPDH-R | TTCAGCTCTGGGATGACCTT |
| M-MTOR-F | AATGCTATGGAGGTTACGGGTCTG |
| M-MTOR-R | CGCTTATTGCCTTTGGTATTTGTG |
| M-PKM-F | GGTGACGGAGGTGGAGAATGGTGG |
| M-PKM-R | CGATTTTGCTGATGATCTTGATGT |
| M-ATF4-F | CTGACTCTGCTGCTTACATTACTC |
| M-ATF4-R | TGTCTTGTTTTGCTCCATCTTTTT |
| M-DLD-F | CTACAAAAGCCGATGGCAGCACTC |
| M-DLD-R | TCCACCCACATGACCCAAAAATTC |
| M-MAP3K5-F | AGAAAAGGACGGGAAAGGGATACG |
| M-MAP3K5-R | GCTCGAGATGAGGGTTGTGATGTG |
| M-PRDX2-F | ATTACGGCGTGTTGAAAAATGATG |
| M-PRDX2-R | AAAGGCCTGGACTAGGCGGAGAGC |
| M-KRAS-F | GGGGAGGGCTTTCTTTGTGTATTT |
| M-KRAS-R | CCCATCTTTGCTCATCTTTTCTTT |
| M-HDDC3-F | CTGGTGAAGCTGGCAGACAAGCTA |
| M-HDDC3-R | TTTTGGGGAGGACTGTGGAAGGAC |

**Supplementary Table 2. The top 15 up-regulated and down-regulated DEGs**

| Name | Description | log2FoldChange | pval | up/down |
| --- | --- | --- | --- | --- |
| Hbb-b2 | hemoglobin, beta adult minor chain | 6.5064503 | 9.86E-15 | up |
| Glo1 | glyoxalase 1 | 1.7245354 | 4.45E-10 | up |
| Sox11 | SRY (sex determining region Y)-box 11 | 2.0983425 | 5.78E-10 | up |
| Mvb12b | multivesicular body subunit 12B | 2.0568936 | 1.12E-09 | up |
| Hddc3 | HD domain containing 3 | 2.5710878 | 1.22E-09 | up |
| Ssbp2 | single-stranded DNA binding protein 2 | 3.5623226 | 1.51E-09 | up |
| Gadd45gip1 | growth arrest and DNA-damage-inducible, gamma interacting protein 1 | 1.9927148 | 5.87E-09 | up |
| Kras | Kirsten rat sarcoma viral oncogene homolog | 1.5703301 | 7.33E-09 | up |
| Wdfy1 | WD repeat and FYVE domain containing 1 | 2.0720929 | 7.35E-09 | up |
| Zfp775 | zinc finger protein 775 | 2.3807197 | 1.02E-08 | up |
| Dbpht2 | DNA binding protein with his-thr domain | 2.5578083 | 1.16E-08 | up |
| Lrp6 | low density lipoprotein receptor-related protein 6 | 2.8709523 | 1.22E-08 | up |
| Ppfibp1 | PTPRF interacting protein, binding protein 1 (liprin beta 1) | 1.8352535 | 1.59E-08 | up |
| Zbtb46 | zinc finger and BTB domain containing 46 | 2.1879842 | 1.63E-08 | up |
| Cuedc1 | CUE domain containing 1 | 2.6435527 | 1.75E-08 | up |
| Prdx2 | peroxiredoxin 2 | -4.9428957 | 1.67E-13 | down |
| Prrt4 | proline-rich transmembrane protein 4 | -5.5438662 | 9.76E-13 | down |
| B3galt6 | UDP-Gal:betaGal beta 1,3-galactosyltransferase, polypeptide 6 | -3.3115053 | 1.49E-12 | down |
| Ooep | oocyte expressed protein | -3.1647661 | 2.47E-12 | down |
| Abhd16a | abhydrolase domain containing 16A | -6.0527516 | 4.13E-12 | down |
| Chchd4 | coiled-coil-helix-coiled-coil-helix domain containing 4 | -4.0467373 | 1.47E-11 | down |
| Mboat2 | membrane bound O-acyltransferase domain containing 2 | -2.0354458 | 1.07E-10 | down |
| Coq2 | coenzyme Q2 4-hydroxybenzoate polyprenyltransferase | -5.3730939 | 1.47E-10 | down |
| Srp9 | signal recognition particle 9 | -2.449183 | 2.66E-10 | down |
| Prcp | prolylcarboxypeptidase (angiotensinase C) | -2.6773358 | 2.82E-10 | down |
| Rpl29 | ribosomal protein L29 | -4.3150285 | 2.96E-10 | down |
| Psmd8 | proteasome (prosome, macropain) 26S subunit, non-ATPase, 8 | -2.0850849 | 3.29E-10 | down |
| Arl5a | ADP-ribosylation factor-like 5A | -3.9056038 | 3.36E-10 | down |
| Ndufb10 | NADH dehydrogenase (ubiquinone) 1 beta subcomplex, 10 | -2.7155257 | 3.98E-10 | down |
| Runx1t1 | runt-related transcription factor 1; translocated to, 1 (cyclin D-related) | -3.6874671 | 4.97E-10 | down |

**Supplementary Table 3. GO terms for FDEGs**

| GOTERM | Term | PValue | Fold enrichment | Count | GeneRatio | Genes |
| --- | --- | --- | --- | --- | --- | --- |
| GOTERM_BP_DIRECT | GO:0032869~cellular response to insulin stimulus | 4.67E-04 | 25.31 | 4 | 12.90 | PKM, SLC39A14, MTOR, YWHAG |
| GOTERM_BP_DIRECT | GO:0034198~cellular response to amino acid starvation | 0.002163212 | 41.92 | 3 | 9.68 | MTOR, ATF4, MAP3K5 |
| GOTERM_BP_DIRECT | GO:0031667~response to nutrient levels | 0.002630935 | 37.97 | 3 | 9.68 | ZEB1, MTOR, ATF4 |
| GOTERM_BP_DIRECT | GO:1990253~cellular response to leucine starvation | 0.018556693 | 103.20 | 2 | 6.45 | MTOR, ATF4 |
| GOTERM_BP_DIRECT | GO:0030857~negative regulation of epithelial cell differentiation | 0.025605092 | 74.53 | 2 | 6.45 | ZEB1, KRAS |
| GOTERM_BP_DIRECT | GO:0033554~cellular response to stress | 0.029810675 | 63.89 | 2 | 6.45 | PRDX2, MAP3K5 |
| GOTERM_CC_DIRECT | GO:0005829~cytosol | 0.03163316 | 1.71 | 14 | 45.16 | WWTR1, SPHK1, UBE2J2, COPZ1, MTOR, PSMD8, PRDX2, PKM, ZEB1, MEX3A, GNAS, KRAS, YWHAG, MAP3K5 |
| GOTERM_CC_DIRECT | GO:0070062~extracellular exosome | 0.032095494 | 2.46 | 8 | 25.81 | PRDX2, ITIH3, PKM, GNAS, FBLN1, GFRA1, SSBP1, YWHAG |
| GOTERM_MF_DIRECT | GO:0005159~insulin-like growth factor receptor binding | 0.024194462 | 79.03 | 2 | 6.45 | GNAS, YWHAG |
| GOTERM_MF_DIRECT | GO:0005524~ATP binding | 0.026576086 | 2.88 | 7 | 22.58 | PKM, SPHK1, KRAS, UBE2J2, SLC27A5, MTOR, MAP3K5 |

**Supplementary Table 4. KEGG Pathways for FDEGs**

| KEGG_PATHWAY | Term | PValue | Fold enrichment | Count | GeneRatio | Genes |
| --- | --- | --- | --- | --- | --- | --- |
| KEGG_PATHWAY | Alzheimer disease | 3.95297E-05 | 9.89 | 7 | 22.58 | PSMD8, GNAS, UBE2J2, COX7A1, SLC39A14, ATF4, MAP3K5 |
| KEGG_PATHWAY | Pathways of neurodegeneration - multiple diseases | 0.000300659 | 6.85 | 7 | 22.58 | PSMD8, KRAS, COX7A1, SLC39A14, MTOR, ATF4, MAP3K5 |
| KEGG_PATHWAY | Prostate cancer | 0.000945736 | 5.53 | 7 | 22.58 | PSMD8, KRAS, UBE2J2, COX7A1, MTOR, ATF4, MAP3K5 |
| KEGG_PATHWAY | Thermogenesis | 0.001807081 | 15.50 | 4 | 12.90 | ZEB1, KRAS, MTOR, ATF4 |
| KEGG_PATHWAY | Growth hormone synthesis, secretion and action | 0.00252759 | 8.10 | 5 | 16.13 | GNAS, KRAS, COX7A1, MTOR, MAP3K5 |
| KEGG_PATHWAY | Phospholipase D signaling pathway | 0.003314151 | 12.53 | 4 | 12.90 | GNAS, KRAS, MTOR, ATF4 |
| KEGG_PATHWAY | Amyotrophic lateral sclerosis | 0.005965993 | 10.16 | 4 | 12.90 | SPHK1, GNAS, KRAS, MTOR |
| KEGG_PATHWAY | Central carbon metabolism in cancer | 0.012390047 | 5.16 | 5 | 16.13 | PSMD8, COX7A1, MTOR, ATF4, MAP3K5 |
| KEGG_PATHWAY | Viral carcinogenesis | 0.013450796 | 16.11 | 3 | 9.68 | PKM, KRAS, MTOR |
| KEGG_PATHWAY | Chemical carcinogenesis - receptor activation | 0.014330314 | 7.37 | 4 | 12.90 | PKM, KRAS, YWHAG, ATF4 |
